# Supplementary material
Source: Springer Nature journal article supplement (https://www.springermedizin.de/resource/supplementary/12960_2014_480_MOESM4_ESM.docx/9570156)
Supplement: MOESM4 [file 9570156]

| **Project Title** | **Degree sought** | **Year started** |
| --- | --- | --- |
| Factors Associated With Stroke Among Hypertensive Patients: A Case Control Study Among Patients Admitted In Urban Hospitals In Kampala, Uganda. | MS | 2012 |
| Depression In Post-Stroke Patients Attending A Peri-Urban Hospital In Kampala Uganda. | MS | 2012 |
| The Prevalence And Factors Associated With Multiple Anti-Epileptic Drug Requirement In Children. | MS | 2012 |
| The Association Between Immune Status And HIV Depression With Pain Comorbidity. | MS | 2012 |
| Prevalence And Risk Factors Of ADHD Among Children Attending Neurology And Psychiatric Clinics At Mulago National Referral Hospital. | MS | 2013 |
| Prevalence Grading And Associated Risk Factors For Peripheral Neuropathy Among Diabetic Patients Attending Mulago Diabetic Outpatient Clinic. | MS | 2013 |
| Prevalence And Factors Associated With Lower Serum Vitamin B12 Among Diabetic Patients Attending The Diabetic Clinic - Mulago Hospital. | MS | 2013 |
| Sodium Intake In Post-Stroke Patients , And Its Influence On BP Control And Stroke Outcomes In Uganda. | PhD | 2012 |
| Epidemiology, Risk Factors, Prevention And Outcome Of Stroke In Children With Sickle Cell Anemia. | PhD | 2012 |

Figure 3: Neurology MEPI Trainee Projects
